# Supplementary material for: Design and synthesis of room temperature stable Li-argyrodite superionic conductors via cation doping
Source: Royal Society of Chemistry journal article supplement (doi:10.1039/c8ta10790d), 2019-01-01
Supplement: c8ta10790d1.pdf [file c8ta10790d1.pdf]

Supporting Information

## Design and Synthesis of Room Temperature Stable Li-Argyrodite Superionic Conductors *via* Cation Doping

Zhuoran Zhang<sup>a,b,†</sup>, Yulong Sun<sup>a,†</sup>, Xianbao Duan<sup>c</sup>, Linfeng Peng<sup>a</sup>, Huanhuan Jia<sup>a,b</sup>,  
Yunyang Zhang<sup>a,b</sup>, Bin Shan<sup>b</sup>, and Jia Xie<sup>a,\*</sup>

<sup>a</sup> State Key Laboratory of Advanced Electromagnetic Engineering and Technology, School of Electrical and Electronic Engineering, Wuhan 430074, China.

<sup>b</sup> State Key Laboratory of Materials Processing and Die & Mould Technology, School of Materials Science and Engineering, Huazhong University of Science and Technology, Wuhan 430074, China

<sup>c</sup> School of Materials Science and Engineering, Wuhan Institute of Technology, Wuhan 430073, Hubei, China

† These authors contributed equally to this work.

**Table S1.** Energy difference ( $\Delta E$ ) of various ionic substitutions (Al, B, Ge, Si) argyrodites and pure Li<sub>7</sub>PS<sub>6</sub> between HT and LT phase

| <i>substitution</i> | $E_{HT}$ (eV/Å) | $E_{LT}$ (eV/Å) | $\Delta E(E_{HT}-E_{LT})$ (eV/Å) | <i>Stable phase</i> |
|---------------------|-----------------|-----------------|----------------------------------|---------------------|
| None                | -234.79627      | -234.82979      | -0.03352                         | LT phase            |
| Si                  | -234.95776      | -234.78552      | 0.17224                          | HT phase            |
| Ge                  | -230.67633      | -230.52328      | 0.15305                          | HT phase            |
| Al                  | -230.05914      | -231.27840      | -1.21926                         | LT phase            |
| B                   | -235.19432      | -235.28478      | -0.09046                         | LT phase            |

**Table S2.** Composition dependence of the Ionic Conductivity of Cold-Pressed Powder at Room Temperature

| $\text{Li}_{7.2}\text{B}_{0.1}\text{P}_{0.9}\text{S}_6$ | $\text{Li}_{7.2}\text{Al}_{0.1}\text{P}_{0.9}\text{S}_6$ |
|---------------------------------------------------------|----------------------------------------------------------|
| Ionic conductivity $\sigma$ / S $\text{cm}^{-1}$        | Ionic conductivity $\sigma$ / S $\text{cm}^{-1}$         |
| $9.88 \times 10^{-6}$                                   | $8.52 \times 10^{-5}$                                    |

**Table S3.** Rietveld refinements of X-ray diffraction data for  $\text{Li}_{7.25}\text{Ge}_{0.25}\text{P}_{0.75}\text{S}_6$  at 298 K.

| Li <sub>7.25</sub> Ge <sub>0.25</sub> P <sub>0.75</sub> S <sub>6</sub> structure from X-ray diffraction data (space group $F\bar{4}3m$ ) ;<br>$a = 9.9543(1)$ Å<br>Fit residuals ( $R_{wp}$ , $R_{exp}$ , $\chi^2$ ): 6.46%, 4.72%, 2.86 |      |          |          |          |                 |                       |
|------------------------------------------------------------------------------------------------------------------------------------------------------------------------------------------------------------------------------------------|------|----------|----------|----------|-----------------|-----------------------|
| Atom                                                                                                                                                                                                                                     | Site | x        | y        | z        | Occ.            | $U_{iso}/ \text{Å}^2$ |
| Li1                                                                                                                                                                                                                                      | 48h  | 0.823(2) | 0.498(1) | 0.676(2) | 0.60(1)         | 0.1043(9)             |
| S1                                                                                                                                                                                                                                       | 16e  | 0.623(1) | x(S1)    | x(S1)    | 1               | 0.0244(4)             |
| S2                                                                                                                                                                                                                                       | 4c   | 0.250    | x(S2)    | x(S2)    | 1               | 0.0164(9)             |
| S3                                                                                                                                                                                                                                       | 4a   | 0        | x(S3)    | x(S3)    | 1               | 0.0302(1)             |
| Ge1                                                                                                                                                                                                                                      | 4b   | 0.500    | x(Ge1)   | x(Ge1)   | 0.23(2)         | 0.0531(3)             |
| P1                                                                                                                                                                                                                                       | 4b   | x(Ge1)   | x(Ge1)   | x(Ge1)   | 1-<br>Occ.(Ge1) | $U_{iso}$<br>(Ge1)    |

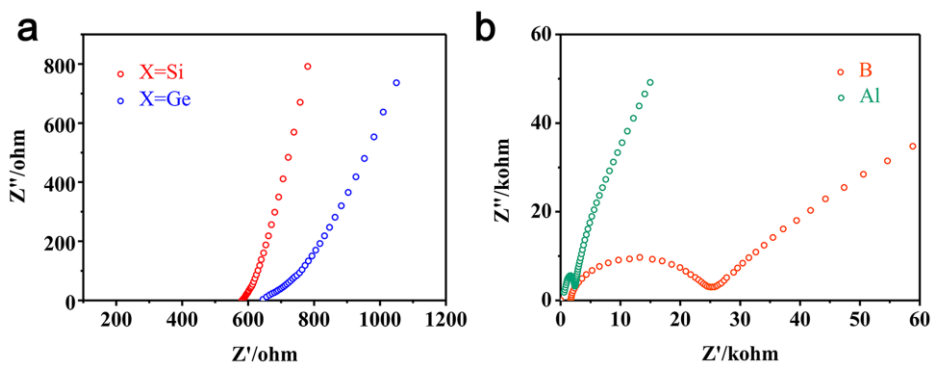

**Figure S1.** a. Nyquist plots of  $Li_{7.1}M_{0.1}P_{0.9}S_6$  ( $M = Si, Ge$ ), b. Nyquist plots of  $Li_{7.2}N_{0.1}P_{0.9}S_6$  ( $N = B, Al$ ) at room temperature.

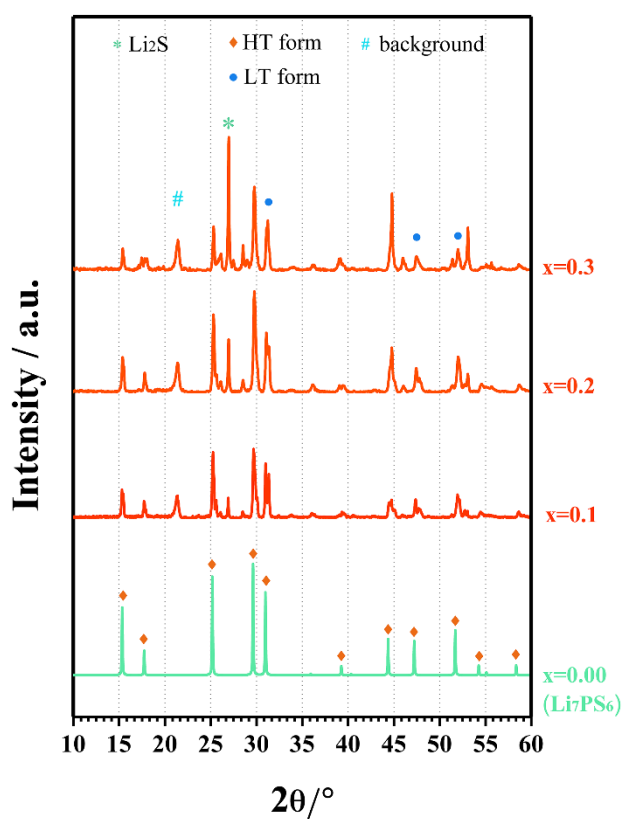

**Figure S2.** X-ray diffraction (XRD) patterns of  $Li_{7+2x}Al_xP_{1-x}S_6$  ( $x = 0.1, 0.2, 0.3$ ).

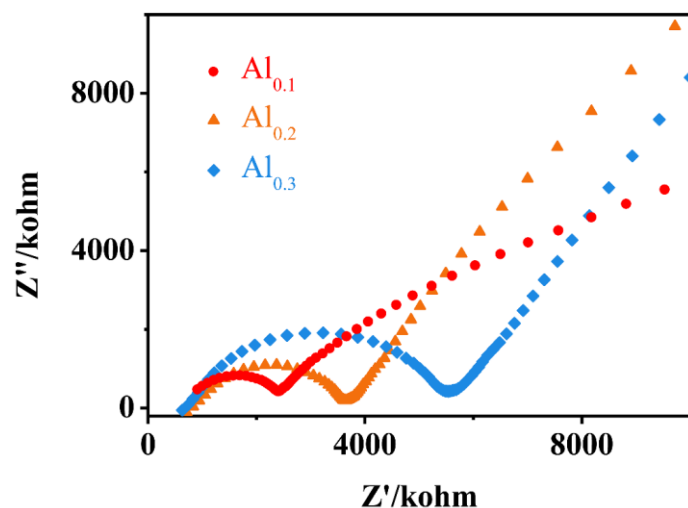

Figure S3. Nyquist plots of  $\text{Li}_{7+2x}\text{Al}_x\text{P}_{1-x}\text{S}_6$  ( $x = 0.1, 0.2, 0.3$ ).

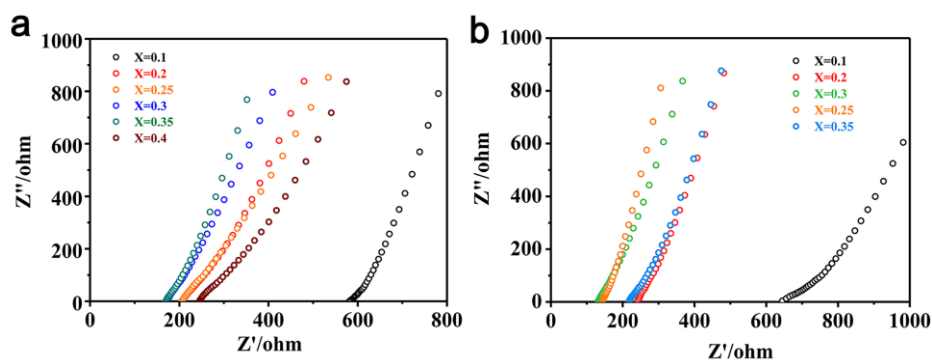

Figure S4. Nyquist plots of  $\text{Li}_{7+x}\text{M}_x\text{P}_{1-x}\text{S}_6$  ( $M = \text{Si}, \text{Ge}$ ,  $x = 0.1-0.4$ ) at room temperature. a.  $M = \text{Si}$ . b.  $M = \text{Ge}$ .

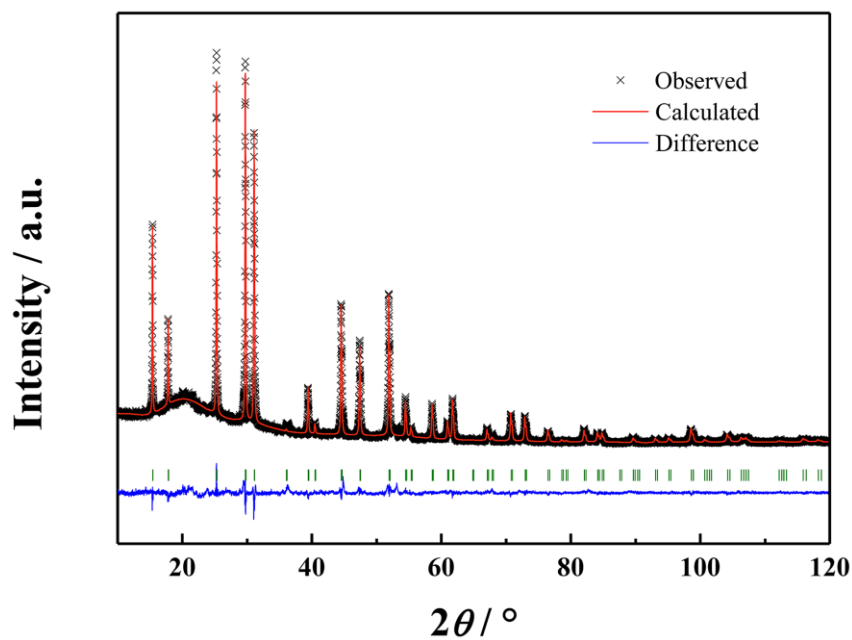

Figure S5. Rietveld refinement pattern of  $\text{Li}_{7.25}\text{Ge}_{0.25}\text{P}_{0.75}\text{S}_6$  at 298 K. Experimental data are shown as points; Red: calculated intensities; black: observed intensities; blue: difference profile. The green markets indicate the positions of the diffraction lines.

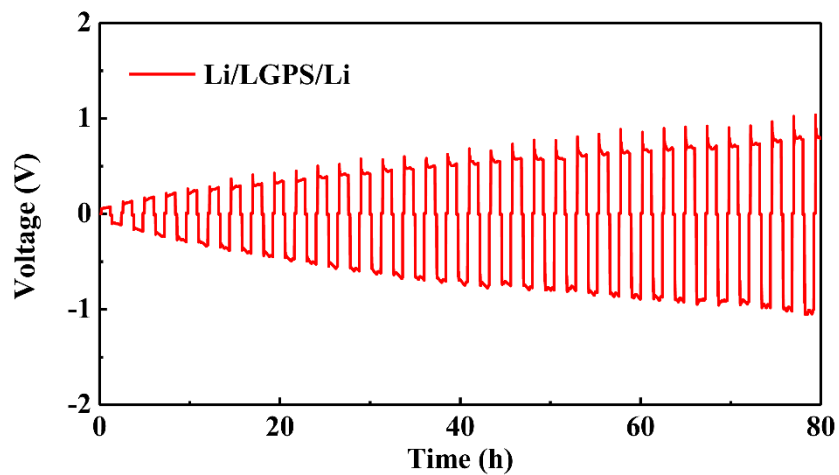

**Figure S6.** Potential profiles during galvanostatic cycling for a Li/LGPS/Li cell.

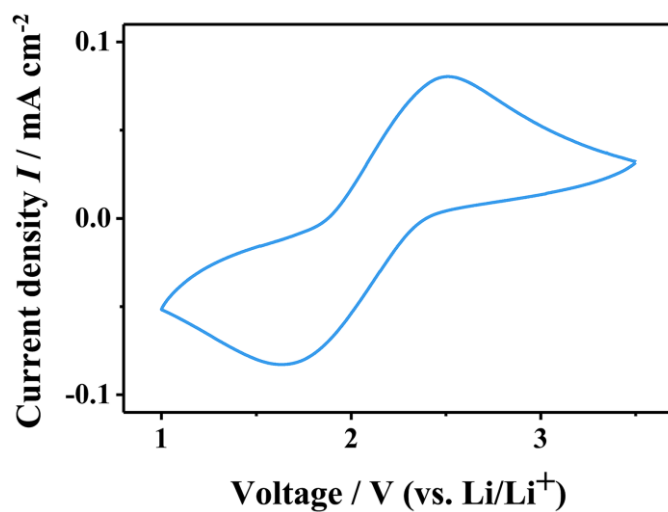

**Figure S7.** Cyclic voltammogram for a Li/Li<sub>7.25</sub>Si<sub>0.25</sub>P<sub>0.75</sub>S<sub>6</sub>/TiS<sub>2</sub> cell; from 1 to 3.5 V at a scan rate of 1 mV s<sup>-1</sup>.

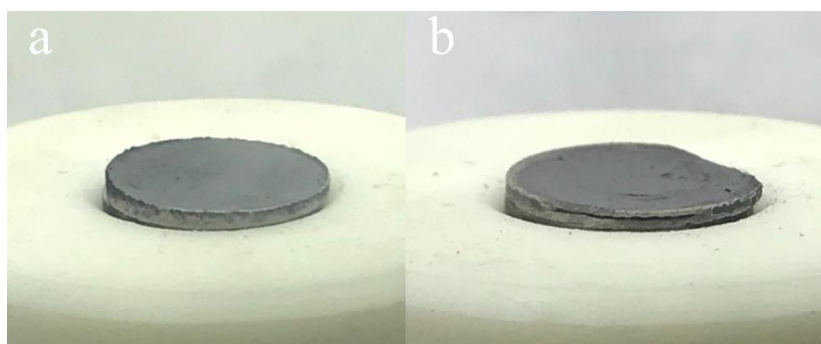

**Figure S8.** Photographs of TiS<sub>2</sub>/SE/Li all-solid-state cell before (a) and after (b) charge-discharge cycle.
